# Supplementary material for: Near-surface snow particle dynamics from particle tracking velocimetry and turbulence measurements during alpine blowing snow storms
Source: Copernicus journal article supplement (doi:10.5194/tc-10-3043-2016), 2016-12-16
Supplement: Supplementary file 1 [file tc-10-3043-2016-supplement.zip]

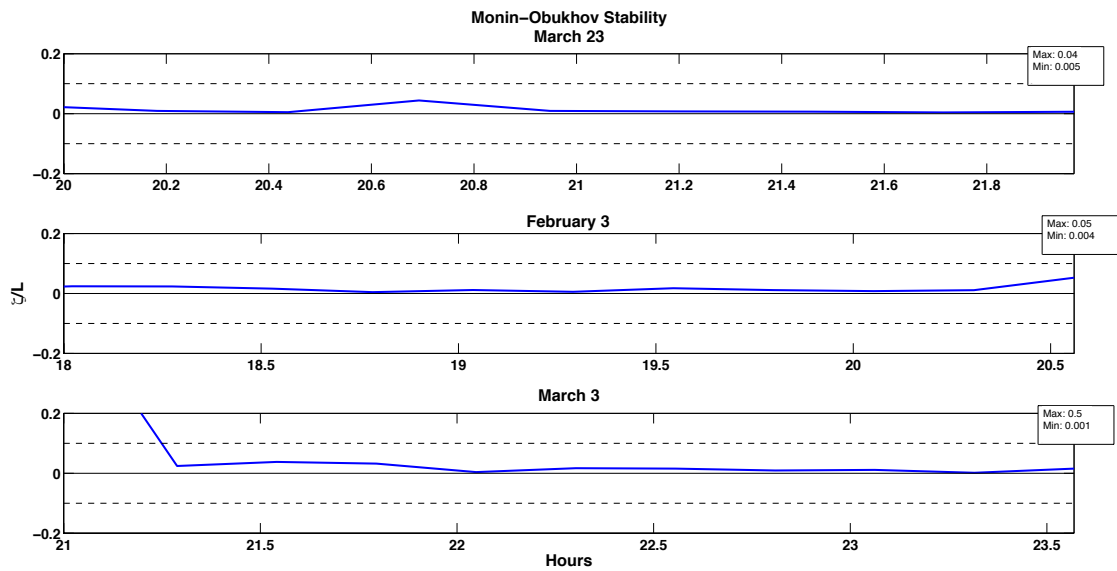

**Figure 1: Monin-Obukhov stability parameters from upper anemometer measurements encompassing three nights of recording indicates slightly stable conditions with dashed lines at values of  $z/L = \pm 0.1$ .**

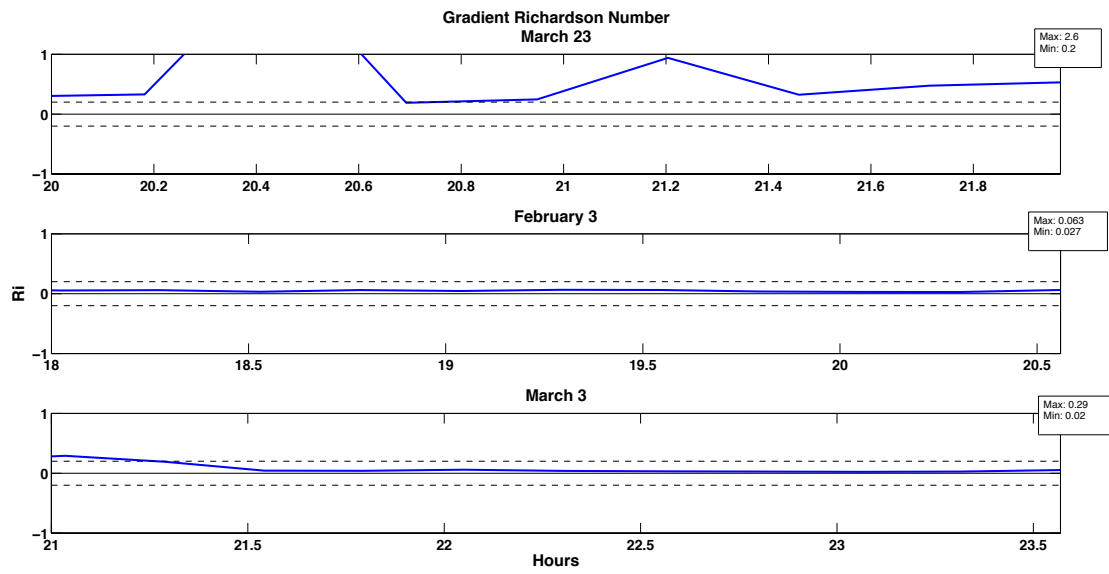

**Figure 2: Gradient/Bulk Richardson parameters utilizing the two anemometer measurements indicates slightly stable conditions over the three nights of recording within critical values as determined by *Foken* (2008) (dashed lines), except deviations on March 23, 2016 due to lower anemometer contamination.**

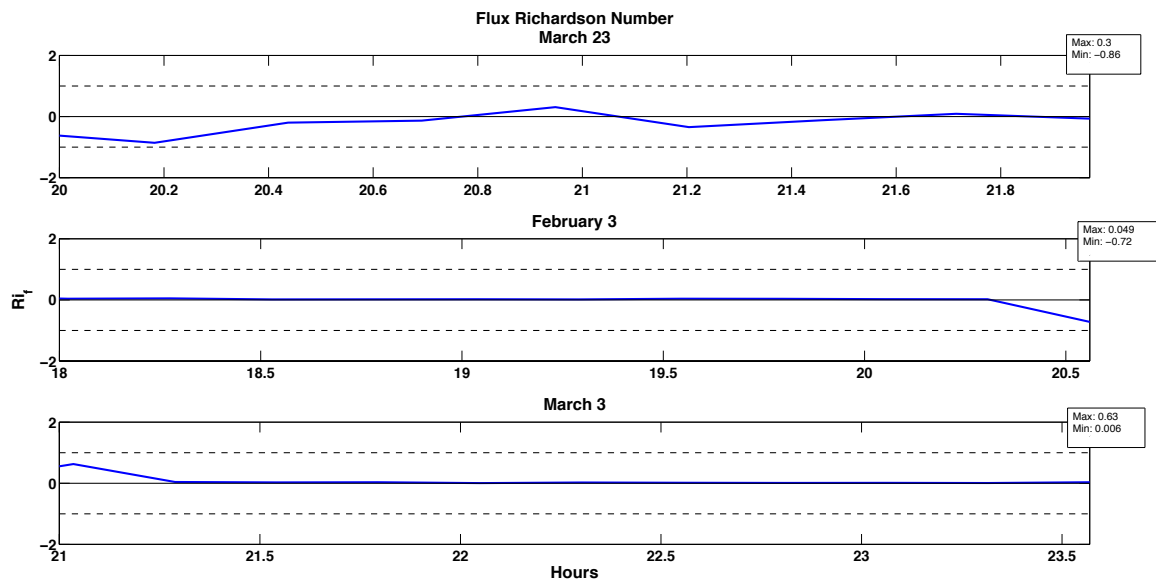

Figure 3: Flux Richardson parameters using upper anemometer measurements encompassing three nights of recording indicates near-neutral conditions over the three nights of recording within critical values as determined by *Foken* (2008) (dashed lines).
