# Supplementary material for: Near-surface snow particle dynamics from particle tracking velocimetry and turbulence measurements during alpine blowing snow storms
Source: Copernicus journal article supplement (doi:10.5194/tc-10-3043-2016), 2016-12-16
Supplement: Supplementary file 2 [file tc-10-3043-2016-supplement.zip]

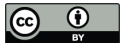

## *Supplement of*

# **Near-surface snow particle dynamics from particle tracking velocimetry and turbulence measurements during alpine blowing snow storms**

**N. O. Aksamit and J. W. Pomeroy**

*Correspondence to:* Nikolas O. Aksamit (n.aksamit@usask.ca)

- tc-10-3043-2016-supplement-title-page.pdf
- tc-2016-95-supplement-version3
  - Aksamit\_PomeroySupplement.pdf
  - Feb3–16.mp4
  - Mar23–15.mp4
  - Mar3–16.mp4
  - Tumblon PTV.mp4

The copyright of individual parts of the supplement might differ from the CC-BY 3.0 licence.
